# Supplementary material
Source: Research Square preprint supplement (doi:10.21203/rs.3.rs-9586511/v1)
Supplement: Supplementary file 1 [file 1ce74569f1241bf249bc21a8.docx]

# Additional files

Additional file 1 (.docx): CARE checklist mapping. This file maps the manuscript to the CARE case-report reporting items required by Journal of Medical Case Reports.

Additional file 2 (.docx/.xlsx): Retrospective JOA and ODI scores. This file provides supportive functional scores at key clinical time points.

Additional file 3 (.txt): Focused review of prior relevant reports. This file summarizes previous reports of hydrocephalus or ventricular enlargement associated with cervical laminoplasty, cervical pseudomeningocele, or postoperative CSF leakage.
