# Supplementary material
Source: Research Square preprint supplement (doi:10.21203/rs.3.rs-9586511/v1)
Supplement: Supplementary file 2 [file 675ee79d7d0f1fd63fbb4948.docx]

# **Additional file 2. Retrospective JOA and ODI scores**

These scores are supportive functional context and are not the primary outcome of the case report.

| **Time point** | **Date** | **Clinical stage** | **JOA score (0–17)** | **ODI (%)** | **Clinical context for retrospective scoring** |
| --- | --- | --- | --- | --- | --- |
| First admission | 2025-01-08 | Preoperative cervical stenosis with right lower-extremity/perineal numbness, sensory disturbance, hyperreflexia, and positive Hoffmann sign | 11 | 36 | Moderate cervical myelopathy pattern; sensory disturbance was prominent, with no documented severe motor weakness or sphincter dysfunction. |
| Early postoperative first discharge | 2025-02-16 | Temporary stabilization after first postoperative admission for CSF leak/pseudomeningocele-related symptoms | 12 | 32 | Slight neurological/functional improvement compared with admission, but postoperative headache/inflammation and recovery burden remained. |
| Second admission | 2025-04-08 | Recurrent headache, dizziness, nausea, vomiting, weakness, fever, ventricular enlargement, and persistent posterior collection | 9 | 58 | Systemic and intracranial-pressure/infectious symptoms caused substantial functional decline. |
| After lumbar drainage/anti-infective treatment, before revision repair | 2025-04-24 | Partial improvement after lumbar drainage and anti-infective treatment, but persistent symptoms and inflammatory CSF abnormalities remained | 10 | 50 | Some response to bridging therapy, but functional status remained impaired before definitive repair. |
| Second discharge after revision repair | 2025-05-21 | Afebrile, no headache, lumbar drainage removed, improved ambulation after dural repair | 14 | 22 | Stable clinical recovery with residual functional limitation. |
| 3-month follow-up | 2025-08-21 | No posterior cervical swelling, fever, or new neurological symptoms | 14 | 22 | Scores remained unchanged from second discharge according to follow-up assessment. |
| 6-month follow-up | 2025-11-21 | No posterior cervical swelling, fever, or new neurological symptoms | 14 | 22 | Scores remained unchanged from second discharge according to follow-up assessment. |

Abbreviations: JOA, Japanese Orthopaedic Association; ODI, Oswestry Disability Index.
